# A mathematical model of non-photochemical quenching to study short-term light memory in plants

Anna Matuszyńska<sup>a</sup>, Somayyeh Heidari<sup>b</sup>, Peter Jahns<sup>c</sup>, Oliver Ebenhöh<sup>a,1</sup>

<sup>a</sup> Cluster of Excellence on Plant Sciences, Institute for Quantitative and Theoretical Biology, Heinrich-Heine University, 40225 Düsseldorf, Germany, <sup>b</sup> Department of Biotechnology and Plant Breeding, Faculty of Agriculture, Ferdowsi University Of Mashhad, 9177948974 Mashhad, Iran, <sup>c</sup> Plant Biochemistry and Stress Physiology, Heinrich-Heine University, 40225 Düsseldorf, Germany

<sup>1</sup> To whom correspondence should be addressed. E-mail: [oliver.ebenhoeh@hhu.de](mailto:oliver.ebenhoeh@hhu.de)

Plants are permanently exposed to rapidly changing environments, therefore it is evident that they had to evolve mechanisms enabling them to dynamically adapt to such fluctuations. Here we study how plants can be trained to enhance their photoprotection and elaborate on the concept of the short-term illumination memory in *Arabidopsis thaliana*. By monitoring fluorescence emission dynamics we systematically observe the extent of non-photochemical quenching (NPQ) after previous light exposure to recognise and quantify the memory effect. We propose a simplified mathematical model of photosynthesis that includes the key components required for NPQ activation, which allows us to quantify the contribution to photoprotection by those components. Due to its reduced complexity, our model can be easily applied to study similar behavioural changes in other species, which we demonstrate by adapting it to the shadow-tolerant plant *Epipremnum aureum*. Our results indicate that a basic mechanism of short-term light memory is preserved. The slow component, accumulation of zeaxanthin, accounts for the amount of memory remaining after relaxation in darkness, while the fast one, antenna protonation, increases quenching efficiency. With our combined theoretical and experimental approach we provide a unifying framework describing common principles of key photoprotective mechanisms across species in general, mathematical terms.

**Keywords:** photosynthetic regulation | light acclimation | xanthophyll cycle

## 1 Introduction

Plants require light for photosynthesis, but excessive light is dangerous, because it can inflict irreparable damage to the photosynthetic apparatus. As sessile organisms, plants therefore require adaptive mechanisms to dynamically react to changing light conditions. A common strategy that has evolved in eukaryotic phototrophs [1] is the dissipation of excess absorbed energy in the form of heat, through processes collectively termed as non-photochemical quenching (NPQ) [2], which can be experimentally assessed by monitoring chlorophyll (Chl) fluorescence dynamics [3]. Analyses of the dynamics of Chl fluorescence quenching identified different NPQ components, which have been assigned to different NPQ mechanisms [4, 5, 6]: (1) the pH-regulated mechanism, qE [7], (2) the state transition mechanism, qT [8], (3) the zeaxanthin dependent quenching, qZ [4, 9], and (4) the photoinhibitory quenching, qI [10].

The discovery of the role of the xanthophyll cycle [11, 12, 13] in NPQ [14] and the identification of xanthophyll cycle mutants [15] provided a significant breakthrough in the understanding of NPQ. Since then, numerous studies supported a critical role of the xanthophyll zeaxanthin (Zx) in energy dissipation. Related to the qE mechanism, a synergistic action of Zx and the thylakoid lumen pH has

been proposed [16], explaining why highest qE levels are inducible only in presence of Zx [4, 17, 18].

Based on titration studies under *in vitro* conditions, Horton and co-workers suggested that Zx shifts the pH-dependence of qE by about 1.5 pH units towards higher lumen pH [18, 19]. Furthermore, Zx was shown to modulate the kinetics of NPQ induction (faster in presence of Zx) and relaxation (slower in presence of Zx) [4, 20, 21], and was proposed to accelerate the reorganisation / aggregation of the PSII antenna [22] that accompanies qE [16, 23, 24, 25, 26]. These characteristics led to the development of the 4 state model of qE [16, 25, 27], which consistently explains the modulation of qE by the lumen pH and Zx, irrespective of the underlying quenching mechanisms and quenching sites involved in qE [24, 28].

Moreover, correlations of the Zx reconversion kinetics with the relaxation of the slower NPQ components qZ and qI indicate a function of Zx also in these processes [4, 29, 30, 31, 32, 33, 34], and Zx reconversion can be considerably down-regulated or inhibited under stress [35, 36] and photoinhibiting [36, 37] conditions. This gradual down-regulation of Zx epoxidation in response to different light stress conditions thus allows the light stress-specific adjustment of the time of Zx accumulation, and hence the modulation of the NPQ response in dependence

of previous light stress, over the full time range from minutes to days or weeks [37]. It should be noted, however, that the accumulation of Zx in parallel with the activation of the different NPQ mechanisms (qE, qZ and qI) does not necessarily imply a direct role of Zx in quenching, but could simply reflect the modulation of the efficiency of quenching or a general photoprotective effect of Zx in the membrane [38]. Plants can thus store information about the illumination history to optimise their photosynthetic performance, simultaneously avoiding damaging effects of over-excitation, and Zx seems to play a crucial role for such a memory effect [28, 39, 40].

Motivated by this apparent connection between the xanthophyll cycle and NPQ induction [41], we used pulse amplitude modulated (PAM) chlorophyll fluorescence analysis to systematically investigate whether a memory of light exposure can be detected on the time-scale of minutes to hours (in contrast to other studies that investigated the illumination memory on a longer timescale [42]). We next constructed a mathematical model on the basis of our current knowledge, to provide a general description of NPQ dynamics and the associated short-term memory.

We previously argued that a major challenge of theoretical biology is to provide simple, yet robust mathematical models that are not specially tailored for one model organism but describe a variety of species [43], because only such generic cross-species models will allow discovery of common generalised principles while understanding the species-specific features. Mathematical models range in complexity from very simplified and abstract models to extremely detailed ones aiming at including all known interactions. Here, our decision on the level of the model complexity depended strongly on the specific research question that the model is designed to address.

Our aim is to find a compromise between an accurate reproduction of experimental observation and a highly reduced complexity. For this, we simplified a number of processes, which are not directly involved in the NPQ mechanism. One particular objective to derive this model is to provide a general framework, that is not specific to one organism, but can be easily adapted to different species and is specifically designed to be convenient to implement and easy to use. By providing the full documented source code, we envisage that it will be further developed by the scientific community.

The model was initially calibrated for the model organism *Arabidopsis thaliana*, a sun-tolerant higher plant. Its flexibility is demonstrated by adapting it to the non-model organism *Epipremnum aureum*, a shadow-tolerant, ornamental plant, for which measured kinetic parameters are sparse. Our model is able to realistically reproduce experimentally obtained fluorescence traces and simulate all main features of chlorophyll induction, including transient activation of NPQ [44], the dynamics of fluorescence relaxation in darkness and qualitative differences in the quenching response to different light intensities. Thus, the model serves as a tool in which the role of the main quenching components can be computationally assessed and quantified, allowing simultaneously to test existing hypotheses on short-term light memory.

## 2 Experimental Approach

Using PAM chlorophyll fluorescence analysis we quantitatively investigated the effect of short-term light memory on NPQ by comparing the fluorescence patterns of the first and second light periods. In the present study (see Fig. 1A), we examined two factors affecting the light memory in plants: intensity of incident light (varying from 100 to 900  $\mu\text{Em}^{-2}\text{s}^{-1}$ ) and the relaxation time between first and second light exposure (15, 30 or 60 min).

We first analysed whether the quenching patterns differ between the two phases of light. We directly analysed the originally measured maximal fluorescence ( $F'_M(t)$ ) data instead of derived NPQ values (visualised in Fig. S3), to avoid mathematical distortion of the kinetics and provide more reliable information on the mechanism [45]. Fluorescence measurements are a non-invasive method for monitoring photosynthetic dynamics, providing information on the photosynthetic efficiency, protection and energy dissipation. However, each measurement can only be relative [46], and therefore at first data is normalised to the maximal fluorescence (measured after the first saturating pulse of light applied to a dark adapted plant,  $F_M$ ) and then averages and standard deviations of the three replicates are calculated. In Fig. 1B we visualise the maximal fluorescence kinetics in the first (training) and second (memory) light phase (shifted to time 0). To highlight the key features which we aimed to explain with the mathematical model, only the last two measurements taken in dark phase (marked by grey background) and the first five measurements taken in consecutive light phases are displayed (for full traces of all 22 points taken during the experiment see either the NPQ trace in Fig. S3 in the Supporting Information (*SI Text*) or extract the data from the database).

It can be observed that for all light intensities the last  $F'_M$  in the relaxation phase (denoted  $F_M^*$ ) is consistently lower than in the training phase ( $F_M$ ). Likewise, the first measurement in light at 61 s shows lower fluorescence than the corresponding point in the training phase (see Tab. S1 for statistical significance). This timed response to previously experienced illumination clearly demonstrates a short-term memory. The extent of the incomplete relaxation is influenced both by light intensity and the time spent in darkness (see Fig. S4).

Based on our current understanding, these observations can be attributed to the dynamical changes in the pigment composition, especially the slow epoxidation of zeaxanthin to violaxanthin in darkness. To quantify the zeaxanthin contribution to the memory effect we measured the pigment composition at the end of each phase of the experiment (full analysis summarised on Fig. S5). Fig. 2 shows that after exposing the samples for 15 minutes to high light intensities, Zx levels significantly increased up to 50% of all xanthophyll cycle pigments (sum of violaxanthin, antheraxanthin (Ax) and zeaxanthin). Simultaneously, one hour in dark was sufficient to reduce this by half, explaining lower quenching effects in samples kept for longer periods in dark. This decrease was not as pronounced under illumination with the lowest light intensity. Moreover, zeaxanthin concentrations alone cannot explain

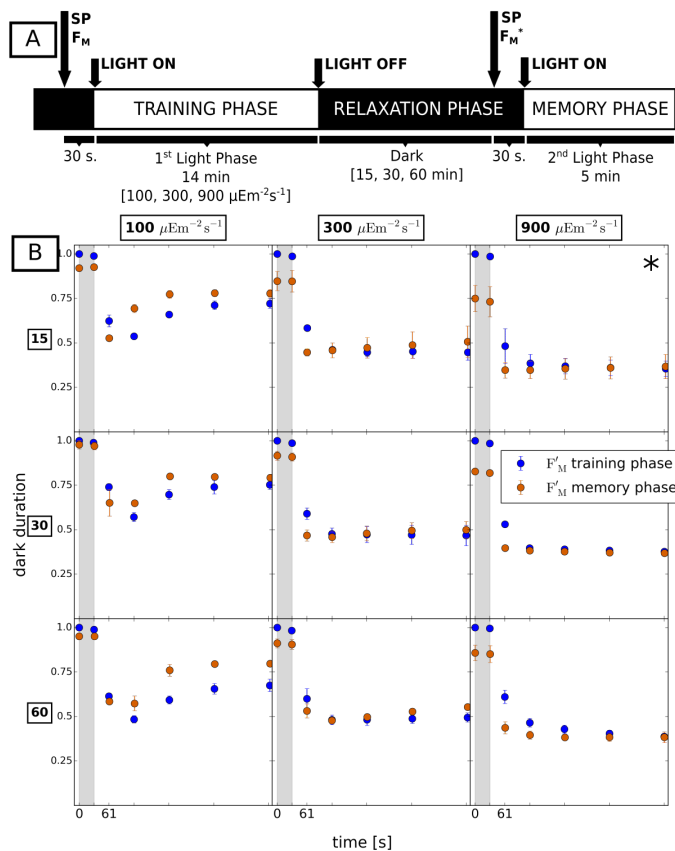

**Figure 1:** (A) Design of the experiment. Dark adapted plants were exposed to a first saturating pulse of light (SP) from which physiological parameters such as maximal fluorescence ( $F_M$ ) and photosynthetic yield ( $\Phi_{PSII}$ ) were derived. 30 s into darkness a second SP was applied, then the light was switched on for a fixed (training) period of 14 minutes. SPs were applied in a defined sequence (see Fig. S1), yielding maximal fluorescence ( $F'_M$ ). The training period was followed by a dark period, interrupted by six SP to follow the fluorescence relaxation dynamics. Subsequently, in the second (memory) period, the same illumination intensity as in the training period was applied. Each experiment was repeated three times for three light intensities ( $100, 300$  and  $900 \mu\text{Em}^{-2}\text{s}^{-1}$ ) and different relaxation times (15, 30 and 60 min). (B) Comparison of the first two  $F'_M$  measurements taken in darkness and first five measurements in training phase (blue points) with the last two measurements taken in the relaxation phase and first five measurements in the second light phase (red points). The first measurement taken in the light (at 61 s) is lower in the memory phase than in the training phase, regardless of light intensity and time of relaxation. Error bars indicate standard deviations for three replicates except for the experiment marked with \*, where the experiment was repeated eight times (see the *SI Text* for motivation).

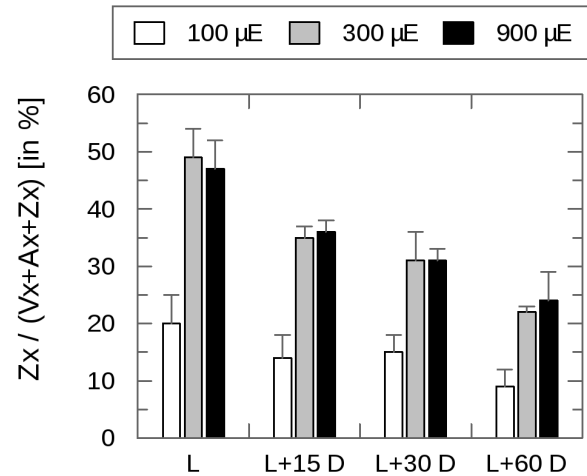

**Figure 2:** Pigment composition at the end of each phase (L=light, D=dark) presented as ratios of zeaxanthin (Zx) to total xanthophylls ( $Vx + Ax + Zx$ ).

that under  $100 \mu\text{Em}^{-2}\text{s}^{-1}$  the fluorescence signal for the later time points is higher in the memory phase compared to the training phase. This indicates that also the relaxation of the transient NPQ depends on the light memory, a conclusion consistent with the previous findings by Johnson *et al.* [20].

### 3 Mathematical Model

Based on our experimental results and our current understanding of NPQ, we developed a small kinetic model to verify our hypothesis on the induction of light memory and to quantify the contribution of its molecular effectors. A general schematic of the model of the electron transport chain is shown in Fig. 3. A mathematical description of the processes, as well as the source code to solve the system numerically, can be found in the *SI Text*. Since the variable chlorophyll fluorescence originates from the antennae associated with PSII [47, 48], we limit our model to the photosynthetic reactions around photosystem II, reducing the system to only six differential equations and 41 parameters (Tab. S3). Photosystem II is modelled as an oxidoreductase and is described by four possible states relating light harvesting capability with the occupation of reaction centres (following [49]). State  $B_0$  corresponds to the light harvesting state: reaction centres are open, ready for absorbing light energy to drive the photosynthetic electron transport chain. State  $B_1$  reflects the excited energy state of chlorophyll after absorption of radiant energy. From this state, in a time scale of nanoseconds, the chlorophyll can relax back to its ground state only through one of the three ways, by fluorescence emission (F), by heat dissipation (H), or by photochemistry [2] leading to state  $B_2$ , reflecting a 'closed' state, in which charges are separated. State  $B_3$  reflects an inhibited state, in which chlorophyll is excited through absorbed light energy, but the acceptor side of the reaction centre is still occupied. Thus, charge separation and consequently photochemistry cannot occur and the excited chlorophyll can only relax to its ground state through F or H.

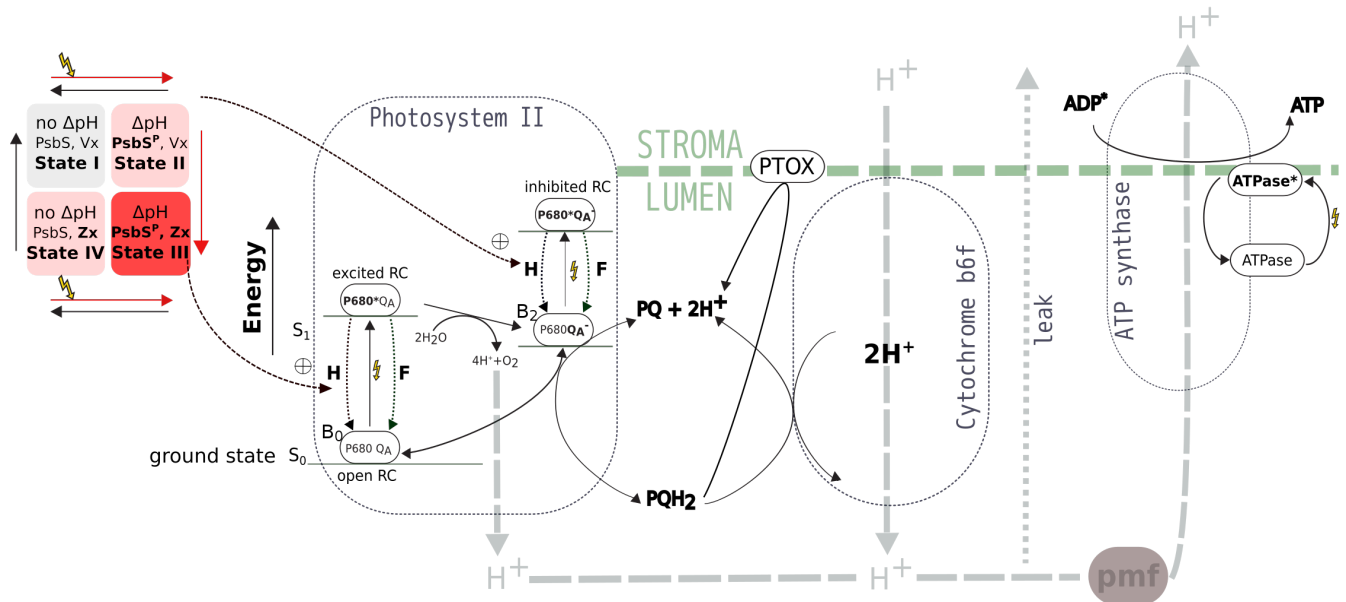

**Figure 3:** Scheme of the components included in the simplified mathematical model. It contains a detailed description of internal processes occurring inside photosystem II (for more details of the four state description of PSII see the *SI Text*) that are directly affected by the 4 state quencher. The plastoquinone pool is reduced by PSII, which also releases protons into the lumen by the oxygen evolving complex. PQ can be oxidised by cytochrome b6/f and PTOX. Oxidation by cyt b6/f is coupled to proton translocation from stroma to lumen. Protonation of the lumen drives the production of ATP through ATPase. ATPase is active in the light and inactive in the dark. Protons can also passively leak out of the thylakoid lumen.

208 Because a number of applied simplifications (see *SI Text*)  
 209 for justification and details) may raise concern whether the  
 210 system will exhibit a biologically meaningful steady state  
 211 under extreme conditions, we investigated the stationary  
 212 redox state of the plastoquinone pool (PQ) over different  
 213 light intensities. Under a wide range of light intensities  
 214 the redox poise is maintained, meaning that the plasto-  
 215 quinone pool is neither too oxidised, nor too reduced to  
 216 limit electron transport (see Fig. S6) [50].

### 217 3.1 Quencher requirements

218 The high-energy-state quenching represents the main com-  
 219 ponent of NPQ and is induced on a time-scale of seconds  
 220 to minutes [39]. Several factors are known to contribute  
 221 to NPQ induction. A fast one requires the generation of  
 222 a proton gradient ( $\Delta\text{pH}$ ) in the thylakoid membrane and  
 223 a slow one is activated by low lumen pH. The quencher  
 224 mechanism implemented in the model is based on a 4 state  
 225 model [16, 25, 27, 51], where the fully relaxed dark state  
 226 (state I) is characterised by maximal Vx concentration and  
 227 de-protonated PsbS protein. In high light, a proton gra-  
 228 dient is rapidly established, and PsbS acts as a proton sen-  
 229 sor and thus activates quenching, constituting the fast quen-  
 230 ching component (state II). Further reduction of the lumen  
 231 pH (to 5.8) triggers de-epoxidation of Vx to Zx, leading  
 232 to state III of a fully activated NPQ. From this, a transfer  
 233 to darkness results in relaxation of  $\Delta\text{pH}$ , and concomitant  
 234 de-protonation of PsbS, leading to state IV, which still  
 235 contributes to the overall quencher activity because of the  
 236 slow relaxation of Zx (see Fig. 3).

237 These considerations lead to the overall equation for the  
 238 quencher activity:

$$Q = \gamma_0 \cdot (1 - Z_s) \cdot [\text{PsbS}] + \gamma_1 \cdot (1 - Z_s) \cdot [\text{PsbS}^{\text{P}}] + \gamma_2 \cdot Z_s \cdot [\text{PsbS}^{\text{P}}] + \gamma_3 \cdot Z_s \cdot [\text{PsbS}], \quad (1)$$

239 where  $Z_s = \frac{[\text{Zx}]}{[\text{Zx}] + k_{\text{ZSat}}}$  reflects the contribution of Zx to the  
 240 quencher and  $k_{\text{ZSat}}$  is a half-saturation constant. The over-  
 241 all concentration of xanthophylls ( $[\text{Vx}] + [\text{Zx}]$ ) is assumed  
 242 to be constant and the temporal changes of  $[\text{Vx}]$  and  
 243  $[\text{PsbS}]$  are determined by appropriate differential equa-  
 244 tions (described in the *SI Text*, Eq. 9 and 10). Thus,  
 245 individual and combined effects of both players on the  
 246 quencher dynamics could be quantified.

247 The  $\gamma$  parameters were fitted to the fluorescence traces  
 248 and their effect on the steady state and quencher activity  
 249 was extensively studied using metabolic control analysis  
 250 [52] (Fig. S7). The parameter  $\gamma_0$  describes the baseline  
 251 quenching that does not require activation (and therefore  
 252 is also active in a dark adapted sample) and was included  
 253 to account for a small quenching observed in double mu-  
 254 tants, where both PsbS and zeaxanthin dependent activa-  
 255 tion is removed [4]. The parameter was fitted to reproduce  
 256 the double mutant behaviour.

### 257 3.2 Transiently generated NPQ

258 It was observed that illuminating dark-adapted plants  
 259 with nonsaturating light transiently induces a strong non-  
 260 photochemical quenching [41, 47], which is explained by  
 261 the transient generation of a transthylakoid pH gradient  
 262 [53]. This transient NPQ relaxes within a few minutes  
 263 when the  $\Delta\text{pH}$  is reduced due to delayed activation of  
 264 ATP and NADPH consuming reactions, including the  $\text{H}^+$ -  
 265 ATPase [54]. In our simplified model focusing on PSII,

we therefore included a delayed activation of ATPase, by which we could realistically reproduce the overall dynamics of transient NPQ activation upon dark-light transition.

It should be noted however that also the ATP and NADPH consuming downstream reactions of the Calvin-Benson-Bassham Cycle (CBB Cycle) are redox regulated and require several minutes to achieve their full activity [55]. This leads to a similar feedback delay in ATP consumption. In a more detailed model encompassing the photosynthetic electron chain and carbon fixation, both delay mechanisms could be included and the individual contributions to the delay assessed.

For our purposes to study and explain NPQ dynamics, including one representative mechanism causing a delayed ATP consumption is sufficient. Thus, in the model ATP synthesis is mediated by an active form of ATPase (denoted ATPase\*), which dynamically changes over time and directly depends on the light availability:

$$\frac{d\text{ATPase}^*}{dt} = k_{\text{actATPase}} \cdot \text{H(PFD)} \cdot \text{ATPase} - k_{\text{deactATPase}} \cdot (1 - \text{H(PFD)}) \cdot \text{ATPase}^*, \quad (2)$$

where  $\text{H}(x)$  is the Heaviside function and PFD stands for photon flux density, expressed in  $\mu\text{Em}^{-2}\text{s}^{-1}$ .

### 3.3 Dynamic simulations

Our model accurately reproduces the changes in the quantum yield of chlorophyll fluorescence simulating various PAM protocols using low, moderate and high light intensities. In the model description, fluorescence is not a system variable. We therefore calculate it from the rate at which excited chlorophyll will revert to its ground state through fluorescence ( $k_F$ ), and not quenching ( $k_H$ ) or photochemistry ( $k_P$ ), and use the fact that the signal is proportional to the occupation of the two ground states of PSII RCs ( $B_0$  and  $B_2$  in Fig. 3) [49, 56]:

$$\Phi_F = \frac{k_F}{k_H \cdot Q + k_F + k_P} [B_0] + \frac{k_F}{k_H \cdot Q + k_F} [B_2], \quad (3)$$

where  $k_H \cdot Q$  is the rate of NPQ, modulated by the quencher activity  $Q$  (Eq. 1).

Determining fluorescence values from the dynamic model variables ( $[B_0]$ ,  $[B_2]$  and  $Q$ ) using Eq. 3, allows for an *in silico* reproduction of all experimentally obtained fluorescence measurements. Fig. 4 depicts a good agreement between the simulated fluorescence traces (for continuous time) and experimentally measured  $F'_M$  (black triangles) and  $F_s$  (blue triangles) values. A transient drop in fluorescence in the training phase is accurately reproduced by the simulation. Also, the fluorescence peaks in saturating light ( $F'_M$ ) are reproduced extremely well, especially the fact that fluorescence does not fully recover after dark relaxation (*cf.* data points in the shaded regions in Fig. 1B). However, some quantitative discrepancies between the simulation and model can be observed. For instance, the first point in the light in the memory phase (Fig. 1A) is higher

in the simulation than in the experiment. Nevertheless, we managed to reproduce the qualitative drop between the corresponding points, as simulated  $F'_M$  in the memory phase is still lower than the corresponding simulated  $F'_M$  in the training phase. The steady-state fluorescence values  $F_s$  show discrepancies especially in the low and intermediate light intensities, but are very well captured for high light and in dark periods. One possible explanation for the deviations of model results from experimental data is that our model does not include other photoprotective mechanisms that may affect  $F_s$ , in particular state transitions [57, 58, 59]. To study this, a more complex model is needed that is specifically designed to investigate the cross-talk and interplay between these two acclimation mechanisms. Since in the present study the focus lies on energy-dependent quenching, we consider the agreement of model and experiment as satisfactory and decide to sacrifice some degree of precision for the sake of a simple model structure.

A clear benefit of computer simulations is the possibility of following the dynamics of otherwise hard to measure molecules. In Fig. 5 we demonstrate how luminal pH changes in the response to different light intensities and how quenching components saturate under high light and relax in darkness. In Fig. 5A we plot simulated dynamics of selected internal system variables, with pH shown in the upper panel and quenching components in the bottom panel. We can observe how the transient drop in luminal pH recovers under low and moderate light conditions but the lumen remains acidic under high light intensity. In the lower panel we can dissect the contribution to the quencher. The fast component (PsbS mediated) is quickly activated and relaxes over time, whereas the slow component continues to increase. In Fig. 5B we provide the same information in a phase phase plot, where the pH is displayed as a function of quencher activity. This representation clearly indicates the different timescales on which the system operates. Trajectories start in the dark state (low  $Q$ , pH close to 8) by rapidly reducing pH (vertical drop), before the quencher is activated (curved trajectories), and eventually the steady-state in constant illumination (red dots) is reached. The memory is visualised by the fact that the trajectories do not revert back to the initial dark state after the first dark relaxation phase, and thus the trajectories during the memory phase differ from those of the training phase.

With the presented mathematical model we are able to simulate different fluorescence kinetics in the training and memory phase, moreover we are able to explore which internal variables are correlated with this different dynamics and quantify their contribution.

### 3.4 Application to a non-model organism

It is a well recognised issue in the field of systems biology that modelling biological processes often requires acquiring a number of parameters [60] of which some might have a physical meaning, some may be a rough approximation of measured values, others may be fitted and some may be simply impossible to measure with current techniques. Much focus was put on developing optimization algorithms that will ease parameter estimation, but the only safe way

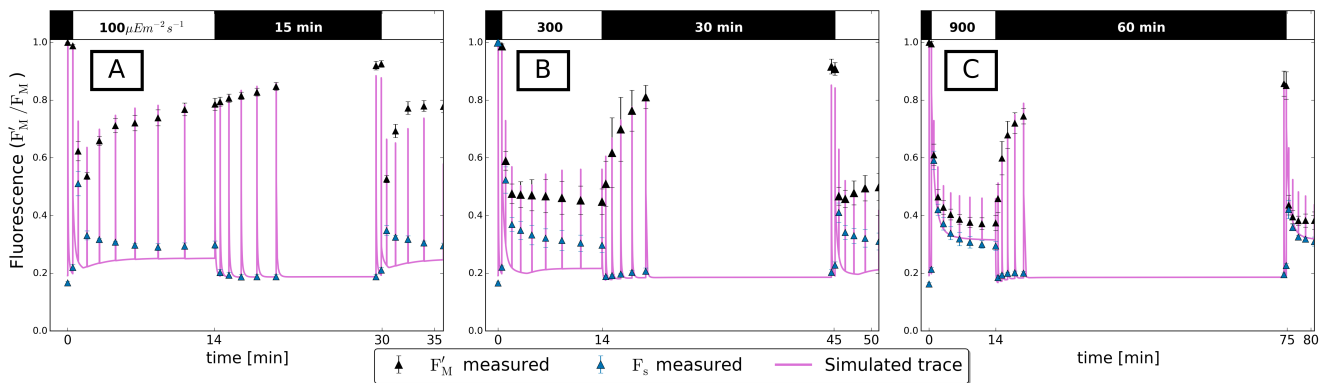

**Figure 4:** Pulse amplitude modulation traces of wild type *Arabidopsis* obtained experimentally (black triangles with error bars for  $F'_M$ , blue triangles for  $F_S$ ) and simulated by the model (solid line) for three different setups. (A) Shown are the results for low light intensity  $100 \mu\text{Em}^{-2}\text{s}^{-1}$  and shortest recovery rate of 15 minutes. The experimentally observed transient drop in fluorescence in the first minute of light exposure is qualitatively reproduced by the model. (B) Results for intermediate light intensity and intermediate relaxation phase. Under this condition neither the experiment, nor simulation show the transient drop in fluorescence. (C) The results for the highest light intensity and longest relaxation period demonstrate that the model also correctly reproduces the relaxation in darkness after one hour.

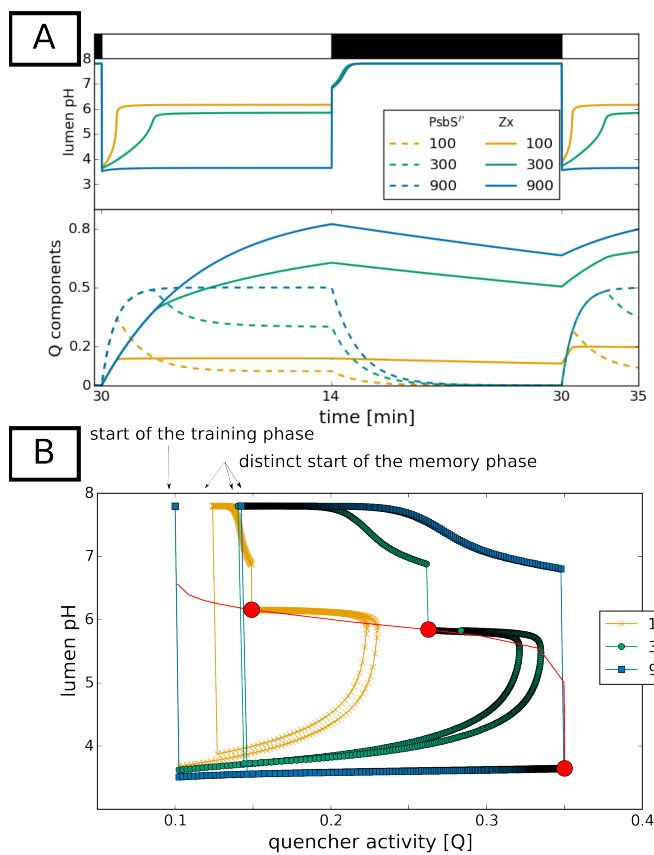

**Figure 5:** Visualisation of luminal pH changes in the response to different light intensities. (A) Internal variables for three different light intensities. The upper panel shows how the ability of relaxing the luminal pH is lost with increasing light intensity. The bottom panel shows the dynamics of the quenching components (solid line for the relative zeaxanthin concentration, dashed line for the ratio of protonated PsbS). (B) The phase plane trajectories of the quenching variable (Q) and the luminal pH during the light memory protocol. The red line depicts stationary states calculated for different light intensities with three red circles marking the steady states for the three light intensities examined experimentally. The markers on the trajectories are set in regular intervals of 1 s to visualise the different time scales on which the system is operating.

to reduce the risk of over-fitting is to minimise the dimensions of the parameter space. One of the difficulties of using available and published kinetic models is their often huge parameter space, which makes them hard to adapt to study analogous mechanisms in other species. To demonstrate that our model is of sufficient simplicity to allow for an easy adaptation to a new and not extensively studied organism, we have adapted our model to the ornamental, shadow-tolerant plant *Epipremnum aureum*, also referred to as *Pothos*. This choice was motivated by the finding that shade-tolerant plants are characterised by longer lasting memory for leaf illumination, as compared to plants found in semi-arid climates [61].

We therefore collected the fluorescence data for *Pothos* using the same experimental setup as described above for *Arabidopsis* (see Figs. S1 and S2). The analysis of the NPQ dynamics demonstrated that under identical conditions this plant exceeds the quenching capacity of *Arabidopsis* (Fig. S3) confirming similar observations on other shadow-tolerant plants [61]. In fact, under moderate light *Pothos* already behaves like *Arabidopsis* exposed to high light. With no additional information available, we assumed that the basic principle of the protecting mechanism is the same in the two plant species, but since *Pothos* exhibits higher quenching capacity, we can reflect it by increasing the parameter  $\gamma_2$ . We measured the chlorophyll content in both species (Tab. S2) and found a 70% higher content in *Pothos* than in *Arabidopsis*. With limited information on the electron transport chain protein abundance, we kept the same values of all internal parameters as for *Arabidopsis* and explained the more sensitive quenching response to light by increasing the factor converting photon flux density to light activation rate. With only those two changes in the parameter space we reproduced the experimentally observed fluorescence and photosynthetic yield kinetics for *Pothos* (Fig. 6).

The agreement between the simulation and experiment allows us to suggest that the enhanced quenching capacity in *Pothos* can be explained by a more efficient energy transfer from the chlorophylls to the quencher. Possible

413 molecular explanations might be an increased number of  
 414 quenching sites or a closer spatial arrangement. To exper-  
 415 imentally test this hypothesis detailed time-resolved fluo-  
 416 rescence measurements would be necessary [51]. The only  
 417 notable discrepancy is observed in the first measurement  
 418 in light in the memory phase. However, whereas the ab-  
 419 solute values are in slight disagreement, the variable fluo-  
 420 rescence is accurately reproduced. This indicates, that  
 421 we capture the key feature of the NPQ dynamics, but by  
 422 keeping the same parameter as for *Arabidopsis*, we might  
 423 slightly underestimate the protonation rate.

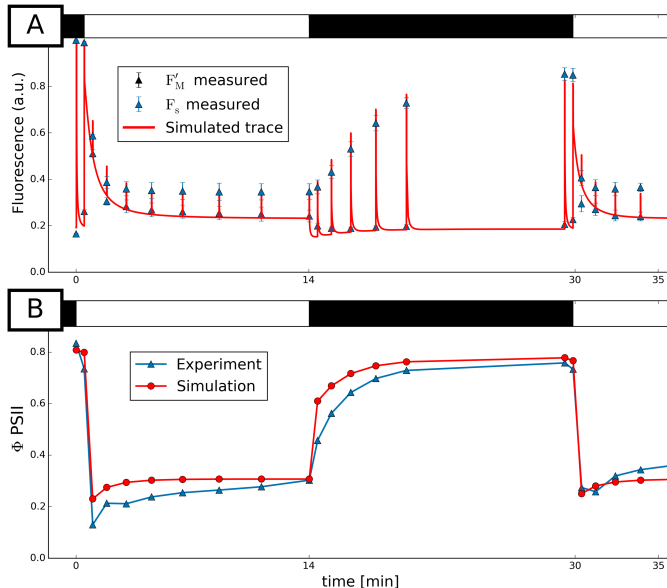

**Figure 6:** (A) Measured and simulated fluorescence traces for *Pothos* exposed to light of  $100 \mu\text{Em}^{-2}\text{s}^{-1}$  intensity. Minimal change into the parameter space of the model enabled reproducing all key features of the fluorescence dynamics. (B) Inhibitory effect of light on the photosynthetic activity (expressed in terms of maximal yield) is reproduced in our simulation.

## 4 Results and Discussion

424 We have constructed a simplified mathematical model that  
 425 is based on our current understanding of the quenching  
 426 mechanisms. By achieving an agreement between our simu-  
 427 lations and experimentally observed behaviour, we could  
 428 confirm that this understanding is basically correct. More-  
 429 over, with the mathematical description of the process we  
 430 could provide a quantitative description of the contribu-  
 431 tion of the two quenching components to light memory. It  
 432 is remarkable that these findings could be obtained by a  
 433 very simple model structure.

434 We realise that very detailed models have the poten-  
 435 tial advantage that they provide a very specific and ac-  
 436 curate representation of experimental observations, but  
 437 increasing complexity generally implies a higher level of  
 438 specialisation, e. g. to one particular organism or even a  
 439 single environmental condition, and moreover systematic  
 440 model analyses become increasingly difficult. The virtue  
 441 in model building lies exactly in the process of simplifi-  
 442 cation because this process allows distilling the essential  
 443

444 features of the investigated system which give rise to its  
 445 characteristic emergent properties. Therefore, developing  
 446 a simple model that can explain the same or even more  
 447 than a more complex model built for the same or simi-  
 448 lar purpose, is in itself a useful scientific exercise, which  
 449 generates a deeper understanding of the biological sys-  
 450 tem. Moreover, simple models are easier to implement  
 451 and can be generalised, but often are limited in the quan-  
 452 titative reproduction of the data. For instance, a model  
 453 of high-energy state quenching of extreme reduced com-  
 454 plexity aims at reproducing the key biological features of  
 455 quenching [56] but is clearly limited in its capability to  
 456 correctly reproduce the dynamics of quenching induction  
 457 and relaxation simultaneously. On the other hand, the de-  
 458 tailed computer model of C3 photosynthesis by Laisk *et*  
 459 *al.* [62] was built to test whether the current understand-  
 460 ing of photosynthesis is basically correct and is able to cor-  
 461 rectly reproduce steady state behaviour of photosynthesis  
 462 and carbon fixation, but cannot reproduce NPQ kinetics.  
 463 A recent model that specifically aimed at understanding  
 464 the transient dynamics of NPQ, was proposed by Zaks *et*  
 465 *al.* [63]. Employing a set of 26 nonlinear differential equa-  
 466 tions, but only considering one quenching state, the model  
 467 is able to reproduce the quantitative difference in the fluo-  
 468 rescence yield between low and high light conditions. The  
 469 complexity of the latter two models makes it difficult to  
 470 derive general conclusions that may be valid beyond the  
 471 boundaries of single species. Further, their size makes a  
 472 *de novo* implementation a very time-consuming task and  
 473 the reproduction and verification of the model results is  
 474 tedious, in particular since they are not provided as open  
 475 source code.

476 We have therefore presented here a new, highly simpli-  
 477 fied mathematical model of NPQ, and employed the model  
 478 not only to accurately describe the rapidly reversible com-  
 479 ponents of non-photochemical quenching, such as the pre-  
 480 viously published models [56, 63], but further used it to  
 481 explain the phenomenon of short-term light memory, and  
 482 moreover provide a quantitative understanding of the dif-  
 483 ferent contributions of the well-known NPQ components.

484 Our model accurately simulates the changes in the fluo-  
 485 rescence yield at low, moderate and high light intensities  
 486 (Fig. 4). It further provides an explanation for the higher  
 487 extent of quenching observed for plants which have pre-  
 488 viously been illuminated. Furthermore, it supports the  
 489 notion that the same organisational principles of photo-  
 490 protective mechanisms are present in plants as different  
 491 as *Pothos* and *Arabidopsis*.

492 With a simple experimental setup with two light expo-  
 493 sure periods separated by a varying relaxation time, we  
 494 demonstrate that the extent of quenching does indeed de-  
 495 pend on how long ago and how much light a plant has  
 496 previously experienced – a behaviour which can safely be  
 497 termed memory. We could demonstrate experimentally  
 498 and theoretically that this light memory can be attrib-  
 499 uted to the slow quenching component associated with the  
 500 depoxidation of violaxanthin to zeaxanthin triggered by low  
 501 luminal pH, which is in agreement with our current knowl-  
 502 edge on NPQ and memory [16, 25, 27]. In the dark, epox-  
 503 idation of zeaxanthin to violaxanthin is slow, so that even  
 504 after 30-60 minutes the conversion is not complete. In a

second exposure to light, the rapidly protonated antennae PsbS-H further contribute to quenching with an increased efficiency when zeaxanthin is still present. This conclusion is supported experimentally by direct comparison of fluorescence traces, demonstrating that light memory is affected by the length of darkness, which again determines the residual levels of zeaxanthin at the last point of darkness (Fig. 2).

Essentially, our model captures all key features of the experimental observations. However, due to the applied reduction, we cannot expect that the model will accurately describe every single aspect of NPQ dynamics, especially if processes are involved, that were not included into the model structure. For example, since the CBB Cycle is not explicitly modelled, but only summarised by a downstream consuming reaction, the effect of the redox regulation of CBB Cycle enzymes cannot be accurately reflected. Moreover, the suggested effect of Zx-induced memory on the transient NPQ in low light conditions cannot be quantitatively reproduced, because we do not incorporate any memory-dependent regulation of ATPsynthase activation. Likewise, the observed discrepancies between simulated and observed Fs levels (Fig. 4) can be explained by the fact that we do not model other acclimation mechanisms, in particular state transitions, which are known to have an effect on the steady state fluorescence [44].

Despite its simplicity, the model structure allows testing various hypotheses on the molecular mechanisms of quenching in mutants impaired in their quenching capabilities. Our simulations for the npq4 mutant, which is lacking the pigment-binding protein associated with photosystem II, but has a normal xanthophyll cycle, are in good qualitative agreement with previously published work on that mutant [64] (Fig. S8). Although mutant analysis is not in the focus of this research, this again demonstrates the flexible use and adaptability of our model and indicates its value when interpreting experimental results.

Moreover, our model can be applied to studies that focus on memory in the context of optimisation of photosynthesis (we refer readers to an excellent review covering this topic [40]). For instance, the model can be used to find a theoretical optimum size of the xanthophyll cycle pool, by systematical increasing or decreasing the pool size, in order to find a balance between the benefit of a large pool leading to increased antioxidant, photoprotective activity [65], and the negative effect on the overall photosynthetic efficiency. Additionally, the response of a plant to a wide range of light protocols can be predicted, such as for example repeated light-dark cycles.

The carefully chosen selective model reduction helps to identify common underlying principles of NPQ in different photosynthetic organisms, and we expect that the model should be easily adapted even to distantly related species such as diatoms, where despite a different molecular nature of the xanthophylls, the cycle still operates according to the same principles as in higher plants [1].

Finally, thanks to the modular structure of the model, it should be a straightforward exercise to utilise this work in the context of a more detailed model of photosynthesis, such as the model on state-transitions in *Chlamydomonas reinhardtii* previously published by some

of us [49], which does not include any mechanistic details of energy-dependent quenching.

## 5 Concluding remarks

We have demonstrated that our current understanding of quenching processes can be converted into more general, mathematical terms and with the implemented theory we can reproduce the most critical behavioural features of short-term illumination memory. This memory is generated by the interaction of two components of NPQ, that were previously identified by many others. The slower one, accumulation of zeaxanthin, accounts for the amount of memory lasting after relaxation in darkness, while the fast one increases the efficiency of quenching. However, our experiments do not provide evidence for an acceleration of quenching activity by previous light exposure. Rather, we propose to explain the consistently lower  $F'_M$  in the first seconds of the second light period by accumulation of Zx only. Therefore, plants with active short-term memory of previously experienced light initiate their photoprotection with some head-start, but at the same speed. Moreover, our computational model supports hypotheses on why shadow-tolerant plants exhibit a higher quenching capacity. Together with this manuscript we provide all necessary files to repeat and perform further experiments *in silico*, therefore we encourage our readers to treat this adaptation as an example of how our model can be used to test hypotheses regarding NPQ in other, also less studied organisms. Further, because of its simplicity and easy adaptability, the model has the potential to support knowledge transfer from lab to field. Especially in combination with cheap and easy-to-use devices to measure photosynthetic parameters outdoors (such as MultispeQ designed by the PhotosynQ project [66]), our model provides a theoretical framework in which the multitude of data can be interpreted in a sophisticated way. Thus, it can serve as a bridge to understand in how far observations obtained under controlled lab conditions allow deriving conclusions about the behaviour in real, highly fluctuating, outdoor conditions. Therefore, its real usefulness will depend on the creativity of its users.

**Plant materials and growing conditions** *Arabidopsis* (*Arabidopsis thaliana* ecotype Columbia 0) wild-type and *Pothos* (*Epipremnum aureum*) were grown in soil at the temperature of 23°C under light intensity of 90-100  $\mu\text{Em}^{-2}\text{s}^{-1}$  with a 16 hours light/8 hours night regime. Detached leaves from three-weeks old *Arabidopsis* and two-months old *Pothos* plants were used for the measurements. To ensure perfect relaxation, plants were dark adapted for at least 12 h before the measurements.

**Fluorescence measurements** Chlorophyll fluorescence measurements were taken using PAM-2000 fluorometer (Heinz Walz, Germany) with external Halogen lamp and a DT-Cyan special interference filter (eliminating  $\lambda > 700$  nm) mounted directly on the lamp. A leaf attached to the measuring window of thne fluorometer was illuminated by a train of weak probing flashes (475



622 nm). The average intensity of measuring light was  
623  $\leq 0.1 \mu\text{Em}^{-2}\text{s}^{-1}$  and of saturating pulses of light was  
624  $2650 \mu\text{Em}^{-2}\text{s}^{-1}$ . Each pulse was applied for 0.8 s and the  
625 exact times of pulse application are to be found in the *SI*  
626 *Text*.

627 **Pigment analysis** For pigment extraction, frozen plant  
628 material was homogenised in presence of cold acetone. Un-  
629 solubilised material was removed by short centrifugation  
630 and the pigment content of the acetone extract was anal-  
631 ysed by reversed-phase HPLC according to Färber *et al.*  
632 [67].

633 **Simulations** The differential equations were numerically  
634 solved using the SciPy library, a Python-based ecosystem  
635 of open-source software for mathematics, science and engi-  
636 neering. We provide the open source code that can repro-  
637 duce all figures presented in this paper, including instruc-  
638 tions in the *SI Text*.

639 **Acknowledgment** This work was financially supported  
640 by the European Union Marie Curie ITN AccliPhot  
641 (PITN-GA-2012-316427) to A.M. and O.E., Deutsche  
642 Forschungsgemeinschaft Cluster of Excellence on Plant  
643 Sciences, CEPLAS (EXC 1028) to O.E. and Deutsche  
644 Forschungsgemeinschaft (JA 665/10-1) to P.J. We also  
645 wish to thank Dr Ovidiu Popa for the statistical consul-  
646 tations and Dr Stefano Magni and anonymous reviewers  
647 for invaluable comments that helped us to improve this  
648 manuscript.

## 649 References

650 [1] R. Goss, B. Lepetit, Biodiversity of  
651 NPQ., *J. Plant Physiol.* 172 (2015) 13–32.  
652 doi:10.1016/j.jplph.2014.03.004.

653 [2] P. Müller, X. P. Li, K. K. Niyogi, Non-  
654 photochemical quenching. A response to excess light  
655 energy., *Plant Physiol.* 125 (4) (2001) 1558–1566.  
656 doi:10.1104/pp.125.4.1558.

657 [3] G. H. Krause, P. Jahns, Non-photochemical Energy  
658 Dissipation Determined by Chlorophyll Fluorescence  
659 Quenching: Characterization and Function, in: G. C.  
660 Papageorgiou, Govindje (Eds.), *Chlorophyll a Fluo-*  
661 *resc. A Signat. Photosynth.*, Springer, 2004, Ch. 18,  
662 pp. 461–495.

663 [4] M. Nilkens, E. Kress, P. Lambrev, Y. Miloslavina,  
664 M. Müller, A. R. Holzwarth, P. Jahns, Identifica-  
665 tion of a slowly inducible zeaxanthin-dependent com-  
666 ponent of non-photochemical quenching of chloro-  
667 phyll fluorescence generated under steady-state con-  
668 ditions in Arabidopsis, *Biochimica et Biophysica*  
669 *Acta - Bioenergetics* 1797 (4) (2010) 466–475.  
670 doi:10.1016/j.bbabi.2010.01.001.

671 [5] W. P. Quick, M. Stitt, An examination of factors con-  
672 tributing to non-photochemical quenching of chloro-  
673 phyll fluorescence in barley leaves, *Biochimica et*

*Biophysica Acta (BBA)-Bioenergetics* 977 (3) (1989)  
287–296. 674 675

[6] R. G. Walters, P. Horton, Resolution of compo-  
676 nents of non-photochemical chlorophyll fluorescence  
677 quenching in barley leaves, *Photosynthesis Research*  
678 27 (2) (1991) 121–133. 679

[7] J.-M. Briantais, C. Vernotte, M. Picaud, G. Krause,  
680 A quantitative study of the slow decline of chlorophyll  
681 a fluorescence in isolated chloroplasts, *Biochimica et*  
682 *Biophysica Acta (BBA)-Bioenergetics* 548 (1) (1979)  
683 128–138. 684

[8] J. F. Allen, J. Bennett, K. E. Steinback, C. Arntzen,  
685 Chloroplast protein phosphorylation couples plasto-  
686 quinone redox state to distribution of excitation en-  
687 ergy between photosystems, *Nature* 291 (5810) (1981)  
688 25–29. 689

[9] L. Dall’Osto, S. Caffarri, R. Bassi, A mechanism  
690 of nonphotochemical energy dissipation, independent  
691 from psbs, revealed by a conformational change in the  
692 antenna protein cp26, *The Plant Cell* 17 (4) (2005)  
693 1217–1232. 694

[10] G. H. Krause, Photoinhibition of photosynthesis. an  
695 evaluation of damaging and protective mechanisms,  
696 *Physiologia Plantarum* 74 (3) (1988) 566–574. 697

[11] H. Y. Yamamoto, T. O. Nakayama, C. O. Chichester,  
698 Studies on the light and dark interconversions of  
699 leaf xanthophylls., *Arch. Biochem. Biophys.* 97 (1962)  
700 168–173. doi:10.1016/0003-9861(62)90060-7. 701

[12] E. Pfündel, W. Bilger, Regulation and possible func-  
702 tion of the violaxanthin cycle, *Photosynthesis Re-*  
703 *search* 42 (2) (1994) 89–109. 704

[13] P. Jahns, D. Latowski, K. Strzalka, Mechanism  
705 and regulation of the violaxanthin cycle: The role  
706 of antenna proteins and membrane lipids, *Biochim.*  
707 *Biophys. Acta - Bioenerg.* 1787 (1) (2009) 3–14.  
708 doi:10.1016/j.bbabi.2008.09.013. 709

[14] B. Demmig-Adams, K. Winter, a. Krüger, F. C. Czy-  
710 gan, Zeaxanthin and the Induction and Relaxation  
711 Kinetics of the Dissipation of Excess Excitation En-  
712 ergy in Leaves in 2% O(2), 0% CO(2)., *Plant Physiol.*  
713 90 (3) (1989) 887–93. 714

[15] K. K. Niyogi, a. R. Grossman, O. Björkman, Ara-  
715 bidopsis mutants define a central role for the xan-  
716 thophyll cycle in the regulation of photosynthetic en-  
717 ergy conversion., *Plant Cell* 10 (7) (1998) 1121–1134.  
718 doi:10.1105/tpc.10.7.1121. 719

[16] P. Horton, A. Ruban, D. Rees, A. Pascal, G. Noctor,  
720 A. Young, Control of the light-harvesting function  
721 of chloroplast membranes by aggregation of the lhci  
722 chlorophyll protein complex, *FEBS Lett.* 292 (1991)  
723 1–4. 724

- [17] B. Demmig-Adams, K. Winter, A. Kruger, F.-C. Czygan, Light stress and photoprotection related to the carotenoid zeaxanthin in higher plants, A.R. Liss, New York, 1989, pp. 375–391. 725 726 727 728
- [18] G. Noctor, D. Rees, P. Horton, The relationship between zeaxanthin, energy-dependent quenching of chlorophyll fluorescence, and trans-thylakoid pH gradient in isolated chloroplasts, *Biochim. Biophys. Acta* 1057 (1991) 320–330. 729 730 731 732 733
- [19] D. Rees, G. Noctor, A. V. Ruban, J. Crofts, A. Young, P. Horton, Ph dependent chlorophyll fluorescence quenching in spinach thylakoids from light treated or dark adapted leaves, *Photosynthesis Research* 31 (1) (1992) 11–19. doi:10.1007/bf00049532. 734 735 736 737 738
- [20] M. Johnson, P. Davison, A. Ruban, P. Horton, The xanthophyll cycle pool size controls the kinetics of non-photochemical quenching in *Arabidopsis thaliana*, *FEBS Letters* 582 (2) (2008) 259–263. 739 740 741 742
- [21] A. Ruban, P. Horton, The xanthophyll cycle modulates the kinetics of nonphotochemical energy dissipation in isolated light-harvesting complexes, intact chloroplasts, and leaves of spinach, *Plant Physiology* 119 (2) (1999) 531–542. 743 744 745 746 747
- [22] M. P. Johnson, T. K. Goral, C. D. P. Duffy, A. P. R. Brain, C. W. Mullineaux, A. V. Ruban, Photoprotective energy dissipation involves the reorganization of photosystem II light-harvesting complexes in the grana membranes of spinach chloroplasts, *Plant Cell* 23 (4) (2011) 1468–1479. doi:10.1105/tpc.110.081646. 748 749 750 751 752 753
- [23] N. Betterle, M. Ballottari, S. Zorzan, S. de Bianchi, S. Cazzaniga, L. Dall’Osto, T. Morosinotto, R. Bassi, Light-induced dissociation of an antenna heterooligomer is needed for non-photochemical quenching induction, *Journal of Biological Chemistry* 284 (22) (2009) 15255–15266. 754 755 756 757 758 759
- [24] A. Holzwarth, Y. Miloslavina, M. Nilkens, P. Jahns, Identification of two quenching sites active in the regulation of photosynthetic light-harvesting studied by time-resolved fluorescence, *Chemical Physics Letters* 483 (4-6) (2009) 262–267. 760 761 762 763 764
- [25] P. Horton, M. Wentworth, A. Ruban, Control of the light harvesting function of chloroplast membranes: The LHCII-aggregation model for non-photochemical quenching, *FEBS Letters* 579 (20) (2005) 4201–4206. 765 766 767 768
- [26] M. Johnson, A. Zia, P. Horton, A. Ruban, Effect of xanthophyll composition on the chlorophyll excited state lifetime in plant leaves and isolated LHCII, *Chemical Physics* 373 (1-2) (2010) 23–32. 769 770 771 772
- [27] P. Horton, M. P. Johnson, M. L. Perez-Bueno, A. Z. Kiss, A. V. Ruban, Photosynthetic acclimation: does the dynamic structure and macro-organisation of photosystem II in higher plant grana membranes regulate light harvesting states?, *FEBS J.* 275 (6) (2008) 1069–1079. doi:10.1111/j.1742-4658.2008.06263.x. 773 774 775 776 777 778
- [28] A. V. Ruban, M. P. Johnson, C. D. Duffy, The photoprotective molecular switch in the photosystem II antenna, *Biochimica et Biophysica Acta-Bioenergetics* 1817 (1) (2012) 167–181. 779 780 781 782
- [29] W. I. Adams, B. Demmig-Adams, A. Verhoeven, D. Barker, ‘photoinhibition’ during winter stress: involvement of sustained xanthophyll cycle-dependent energy dissipation, *Functional Plant Biology* 22 (2) (1995) 261–276. 783 784 785 786 787
- [30] P. Jahns, B. Miede, Kinetic correlation of recovery from photoinhibition and zeaxanthin epoxidation, *Planta* 198 (1996) 202–210. 788 789 790
- [31] G. Oquist, N. Huner, Photosynthesis of overwintering evergreen plants, *Annual Review of Plant Biology* 54 (2003) 329–355. 791 792 793
- [32] A. Thiele, K. Schirwitz, K. Winter, G. Krause, Increased xanthophyll cycle activity and reduced D1 protein inactivation related to photoinhibition in two plant systems acclimated to excess light, *Plant Science* 115 (1996) 237–250. 794 795 796 797 798
- [33] A. Verhoeven, Sustained energy dissipation in winter evergreens, *New Phytologist* 201 (1) (2014) 57–65. doi:10.1111/nph.12466. 799 800 801
- [34] A. Verhoeven, W. Adams III, B. Demmig-Adams, Two forms of sustained xanthophyll cycle-dependent energy dissipation in overwintering *Euonymus kiautschovicus*, *Plant Cell Environ.* 21 (1998) 893–903. 802 803 804 805
- [35] W. Adams III, B. Demmig-Adams, T. Rosenstiel, A. Brightwell, V. Ebbert, Photosynthesis and photoprotection in overwintering plants, *Plant Biology* 4 (05) (2002) 545–557. 806 807 808 809
- [36] C. Reinhold, S. Niczyporuk, K. Beran, P. Jahns, Short-term down-regulation of zeaxanthin epoxidation in *Arabidopsis thaliana* in response to photooxidative stress conditions, *Biochimica et Biophysica Acta (BBA) - Bioenergetics* 1777 (2008) 462–469. 810 811 812 813 814
- [37] B. Demmig-Adams, C. M. Cohu, O. Muller, I. Adams, William W., Modulation of photosynthetic energy conversion efficiency in nature: from seconds to seasons, *Photosynthesis Research* 113 (1-3) (2012) 75–88. doi:10.1007/s11120-012-9761-6. 815 816 817 818 819
- [38] M. Havaux, K. Niyogi, The violaxanthin cycle protects plants from photooxidative damage by more than one mechanism, *Proc. Natl. Acad. Sci. USA* 96 (15) (1999) 8762–8767. 820 821 822 823
- [39] P. Jahns, A. R. Holzwarth, The role of the xanthophyll cycle and of lutein in photoprotection of photosystem II, *Biochim. Biophys. Acta - Bioenerg.* 1817 (1) (2012) 182–193. doi:10.1016/j.bbabi.2011.04.012. 824 825 826 827 828
- [40] E. H. Murchie, M. Pinto, P. Horton, Agriculture and the new challenges for photosynthesis research, *New Phytologist* 181 (3) (2009) 532–552. doi:10.1111/j.1469-8137.2008.02705.x. 829 830 831 832

- [41] L. Kalituho, K. C. Beran, P. Jahns, The transiently generated nonphotochemical quenching of excitation energy in Arabidopsis leaves is modulated by zeaxanthin., *Plant Physiol.* 143 (4) (2007) 1861–1870. doi:10.1104/pp.106.095562.
- [42] M. Szechyska-Hebda, J. Kruk, M. Górecka, B. Karpiska, S. Karpiski, Evidence for light wavelength-specific photoelectrophysiological signaling and memory of excess light episodes in Arabidopsis., *Plant Cell* 22 (7) (2010) 2201–2218. doi:10.1105/tpc.109.069302.
- [43] A. Matuszyńska, O. Ebenhöf, A reductionist approach to model photosynthetic self-regulation in eukaryotes in response to light, *Biochem. Soc. Trans.* 43 (6) (2015) 1133–1139. doi:10.1042/BST20150136.
- [44] G. Finazzi, F. Rappaport, A. Furia, M. Fleischmann, J.-D. Rochaix, F. Zito, G. Forti, Involvement of state transitions in the switch between linear and cyclic electron flow in *Chlamydomonas reinhardtii*., *EMBO Rep.* 3 (3) (2002) 280–285. doi:10.1093/embo-reports/kvf047.
- [45] A. R. Holzwarth, D. Lenk, P. Jahns, On the analysis of non-photochemical chlorophyll fluorescence quenching curves: I. Theoretical considerations., *Biochim. Biophys. Acta* 1827 (6) (2013) 786–92. doi:10.1016/j.bbabi.2013.02.011.
- [46] K. Maxwell, G. Johnson, Chlorophyll fluorescence, *J. Exp. Bot.* 51 (345) (2000) 659–668. doi:10.1093/jexbot/51.345.659.
- [47] G. Finazzi, G. N. Johnson, L. Dall’Osto, P. Joliot, F.-A. Wollman, R. Bassi, A zeaxanthin-independent nonphotochemical quenching mechanism localized in the photosystem II core complex., *Proc. Natl. Acad. Sci. U. S. A.* 101 (33) (2004) 12375–12380. doi:10.1073/pnas.0404798101.
- [48] A. Stirbet, G. Y. Riznichenko, A. B. Rubin, Govindjee, Modeling chlorophyll a fluorescence transient: relation to photosynthesis., *Biochemistry* 79 (4) (2014) 291–323. doi:10.1134/S0006297914040014.
- [49] O. Ebenhöf, G. Fucile, G. Finazzi, J.-D. Rochaix, M. Goldschmidt-Clermont, Short-term acclimation of the photosynthetic electron transfer chain to changing light: a mathematical model, *Philosophical Transactions of the Royal Society B: Biological Sciences* 369 (1640). doi:10.1098/rstb.2013.0223.
- [50] J. F. Allen, Chloroplast Redox Poise and Signaling (2004).
- [51] A. Holzwarth, P. Jahns, Non-photochemical Quenching Mechanisms in Intact Organisms as Derived from Ultrafast-Fluorescence Kinetic Studies, Vol. 40, Springer, 2014. doi:10.1007/978-94-017-9032-1\_5.
- [52] R. Heinrich, S. Schuster, The regulation of cellular systems, New York: Chapman & Hall, 1996. doi:10.1007/978-1-4613-1161-4.
- [53] P. Horton, Effects of changes in the capacity for photosynthetic electron transfer and photophosphorylation on the kinetics of fluorescence induction in isolated chloroplasts, *Biochim. Biophys. Acta*, 724 (1983) 404–410.
- [54] J. D. Mills, P. Mitchell, Modulation of coupling factor ATPase activity in intact chloroplasts. Reversal of thiol modulation in the dark, *Biochim. Biophys. Acta - Bioenerg.* 679 (1) (1982) 75–83. doi:10.1016/0005-2728(82)90257-2.
- [55] D. Walker, Photosynthetic induction phenomena and the light activation of ribulose diphosphate carboxylase, *New Phytol.* 72 (1973) 209–235.
- [56] O. Ebenhöf, T. Houwaart, H. Lokstein, S. Schleder, K. Tirok, A minimal mathematical model of nonphotochemical quenching of chlorophyll fluorescence., *Biosystems.* 103 (2) (2011) 196–204. doi:10.1016/j.biosystems.2010.10.011.
- [57] S. Bellafiore, F. Barneche, G. Peltier, J.-D. Rochaix, State transitions and light adaptation require chloroplast thylakoid protein kinase STN7 433 (February) (2005) 2003–2006.
- [58] A. V. Ruban, M. P. Johnson, Dynamics of higher plant photosystem cross-section associated with state transitions (2009) 173–183doi:10.1007/s11120-008-9387-x.
- [59] J. Minagawa, State transitions—the molecular remodeling of photosynthetic supercomplexes that controls energy flow in the chloroplast., *Biochim. Biophys. Acta* 1807 (8) (2011) 897–905. doi:10.1016/j.bbabi.2010.11.005.
- [60] G. Lillacci, M. Khammash, Parameter estimation and model selection in computational biology, *PLoS Comput. Biol.* 6 (3). doi:10.1371/journal.pcbi.1000696.
- [61] O. P. Samoilova, V. V. Ptushenko, I. V. Kuvykin, S. A. Kiselev, O. S. Ptushenko, A. N. Tikhonov, Effects of light environment on the induction of chlorophyll fluorescence in leaves: A comparative study of *Tradescantia* species of different ecotypes, *BioSystems* 105 (1) (2011) 41–48. doi:10.1016/j.biosystems.2011.03.003.
- [62] A. Laisk, H. Eichelmann, V. Oja, C3 photosynthesis in silico., *Photosynth Res* 90 (1) (2006) 45–66. doi:10.1007/s11120-006-9109-1.
- [63] J. Zaks, K. Amarnath, D. M. Kramer, K. K. Niyogi, G. R. Fleming, A kinetic model of rapidly reversible nonphotochemical quenching., *Proc. Natl. Acad. Sci. U. S. A.* 109 (39) (2012) 15757–15762. doi:10.1073/pnas.1211017109.
- [64] L. Dall’Osto, S. Cazzaniga, M. Wada, R. Bassi, On the origin of a slowly reversible fluorescence decay component in the Arabidopsis npq4 mutant., *Philos. Trans. R. Soc. Lond. B. Biol. Sci.* 369 (1640) (2014) 20130221. doi:10.1098/rstb.2013.0221.

- 941 [65] M. P. Johnson, M. Havaux, C. Triantaphylide,  
942 B. Ksas, A. A. Pascal, B. Robert, P. A. Davi-  
943 son, A. V. Ruban, P. Horton, Elevated Zeaxanthin  
944 Bound to Oligomeric LHCII Enhances the Resistance  
945 of Arabidopsis to Photooxidative Stress by a Lipid-  
946 protective , Antioxidant Mechanism \* 282 (31) (2007)  
947 22605–22618. doi:10.1074/jbc.M702831200.
- 948 [66] PhotosynQ Project.  
949 URL <https://www.photosynq.org/>
- 950 [67] A. Färber, A. J. Young, A. V. Ruban, P. Horton,  
951 P. Jahns, Dynamics of Xanthophyll-Cycle Activity  
952 in Different Antenna Subcomplexes in the Photosyn-  
953 thetic Membranes of Higher Plants: The Relationship  
954 between Zeaxanthin Conversion and Nonphotochem-  
955 ical Fluorescence Quenching., *Plant Physiol.* 115 (4)  
956 (1997) 1609–1618. doi:10.1104/pp.115.4.1609.
